# Supplementary material for: Damaging coding variants within kainate receptor channel genes are enriched in individuals with schizophrenia, autism and intellectual disabilities
Source: PubMed Central journal article supplement (PMC6915710; doi:10.1038/s41598-019-55635-4), 2019-12-16
Supplement: 41598_2019_55635_MOESM1_ESM.pdf [file 41598_2019_55635_MOESM1_ESM.pdf]

Damaging coding variants within kainate receptor channel genes are enriched in individuals with schizophrenia, autism and intellectual disabilities.

### **Supplemental Information**

Title: Damaging coding variants within kainate receptor channel genes are enriched in individuals with schizophrenia, autism and intellectual disabilities

Authors: Maria Koromina<sup>1</sup>, Miles Flitton<sup>1</sup>, Alix Blockley<sup>1</sup>, Ian R. Mellor<sup>1</sup>,  
Helen M. Knight<sup>1\*</sup>

<sup>1</sup> School of Life Sciences, University of Nottingham, Nottingham, NG7 2UH, UK

Damaging coding variants within kainate receptor channel genes are enriched in individuals with schizophrenia, autism and intellectual disabilities.

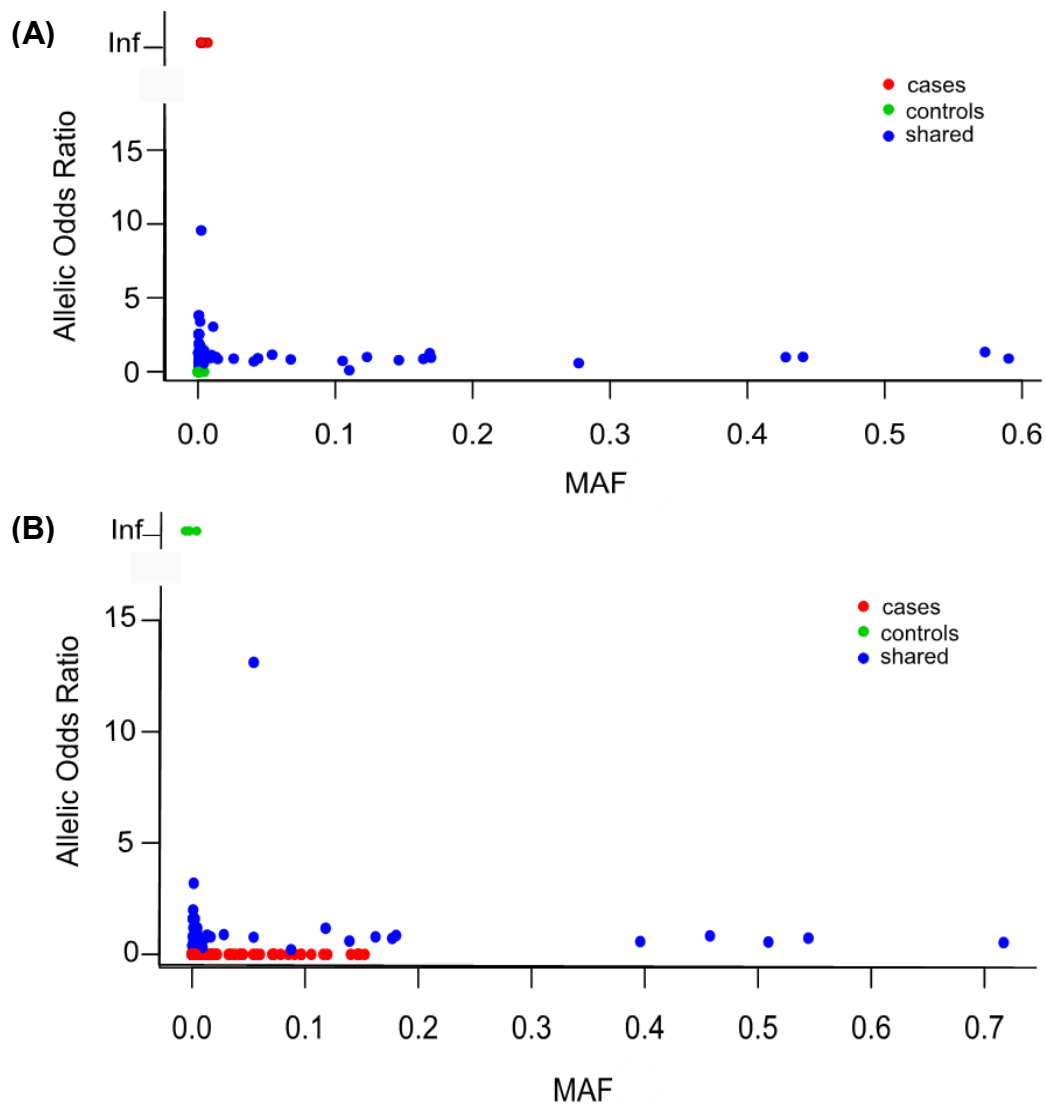

**Figure S1.** Allelic Odds Ratios plotted against minor allele frequencies of all variants identified in the first and second discovery phases. **(A)** Allelic odds ratios plotted against minor allele frequencies of coding variants identified in affected cases only, control individuals only or shared in cases and controls during the first phase study. **(B)** Allelic Odds Ratios plotted against minor allele frequencies of coding variants identified in affected cases only, control individuals only or shared in cases and controls during the second discovery study. Allelic ORs values are color coded with affected cases, red; controls, green; shared, blue. MAF: Minor Allele Frequency.

Damaging coding variants within kainate receptor channel genes are enriched in individuals with schizophrenia, autism and intellectual disabilities.

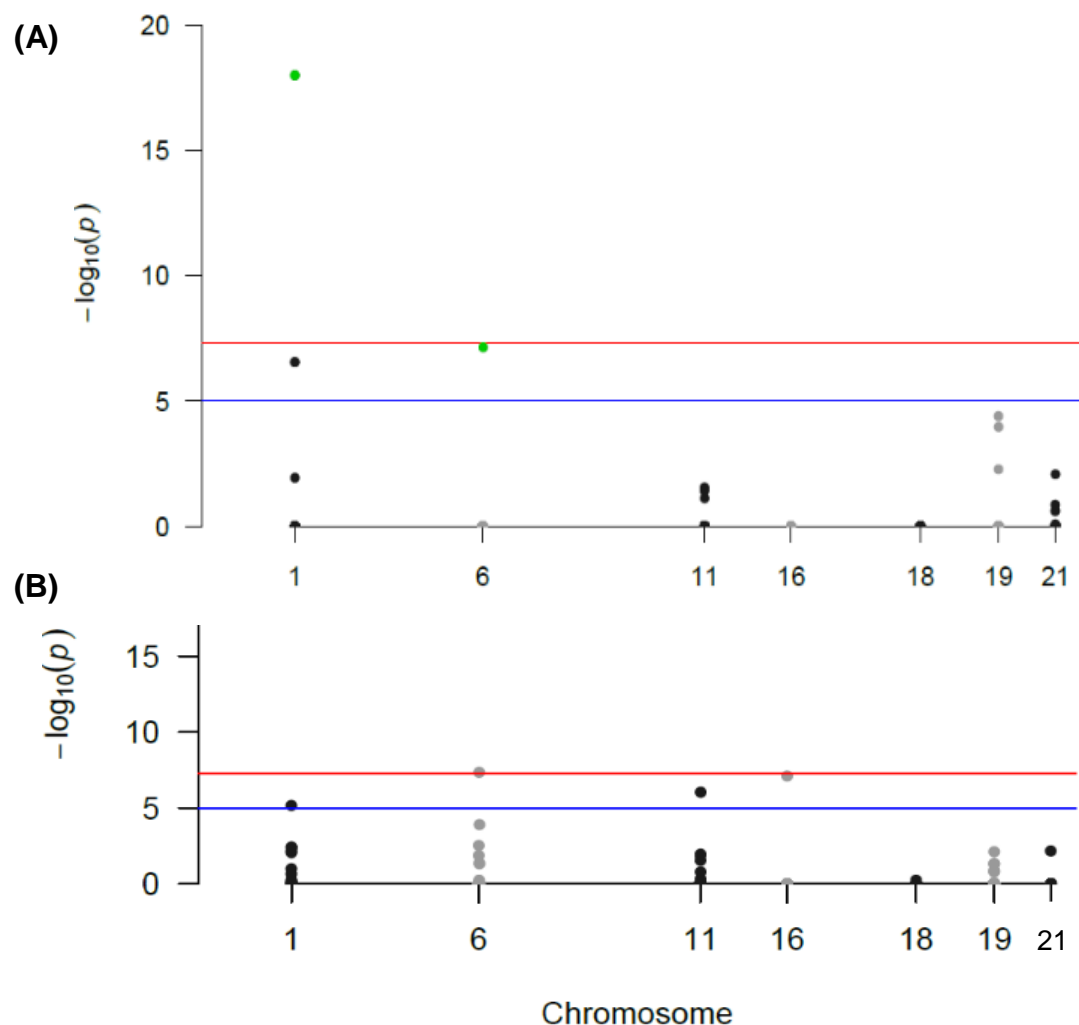

**Figure S2.** Manhattan plots showing significant associations for single alleles within *GRIK* and *NETO* genes. (A) *GRIK* and *NETO* variants identified in the first discovery phase. (B) *GRIK* and *NETO* variants identified in the second discovery schizophrenia cohort phase. Variants are plotted on the x-axis ordered by chromosomal position and  $P$ -values are plotted as  $-\log(p)$  on the y axis. Variants that achieved genome-wide significance ( $p < 5 \times 10^{-8}$ ) are highlighted in green. The blue line depicts a suggestive significance threshold.

Damaging coding variants within kainate receptor channel genes are enriched in individuals with schizophrenia, autism and intellectual disabilities.

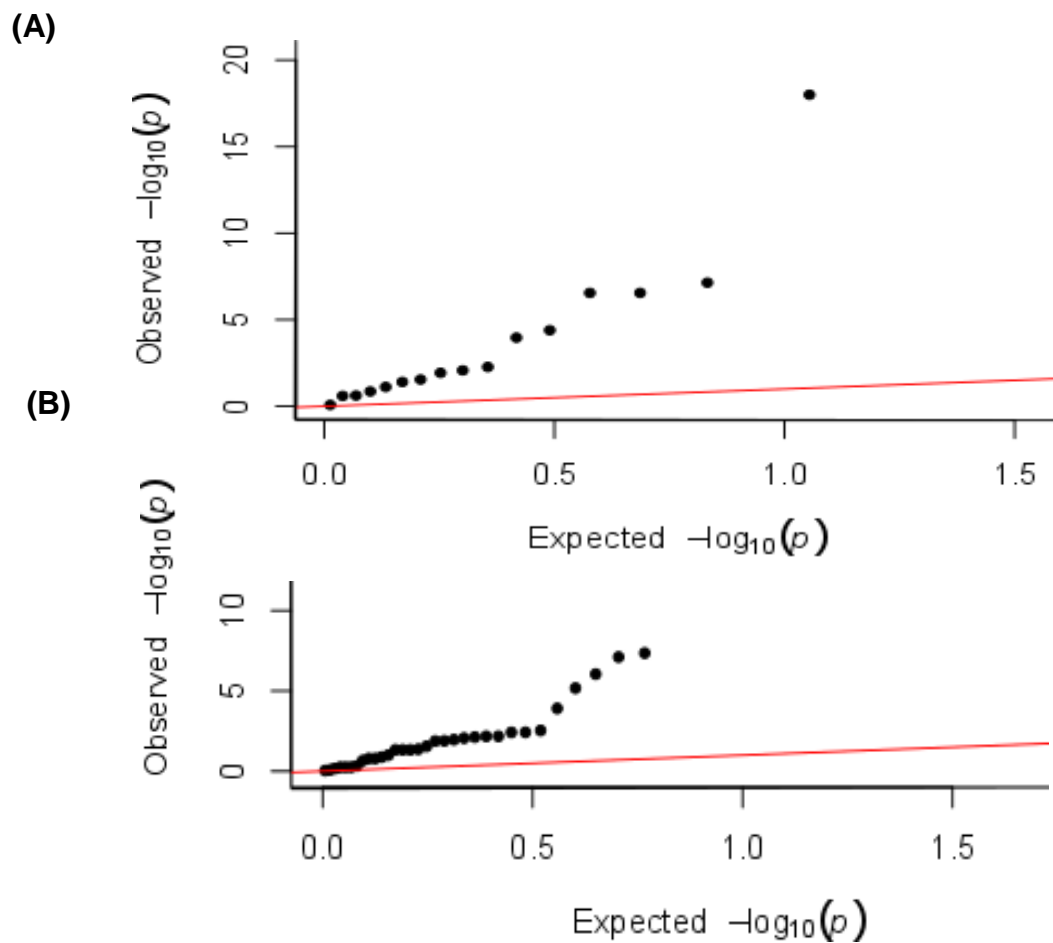

**Figure S3.** QQ plots showing the observed significance of associations plotted as  $-\log(p)$  against the expected  $p$  values. **(A)** GRIK and NETO coding variants from the initial discovery phase. **(B)** GRIK and NETO coding variants from the schizophrenia replication cohort. A Bonferroni correction was applied to all  $p$  values. In both QQ plots an early separation of the observed from the expected  $p$  values is shown suggesting true disease risk associations.

Damaging coding variants within kainate receptor channel genes are enriched in individuals with schizophrenia, autism and intellectual disabilities.

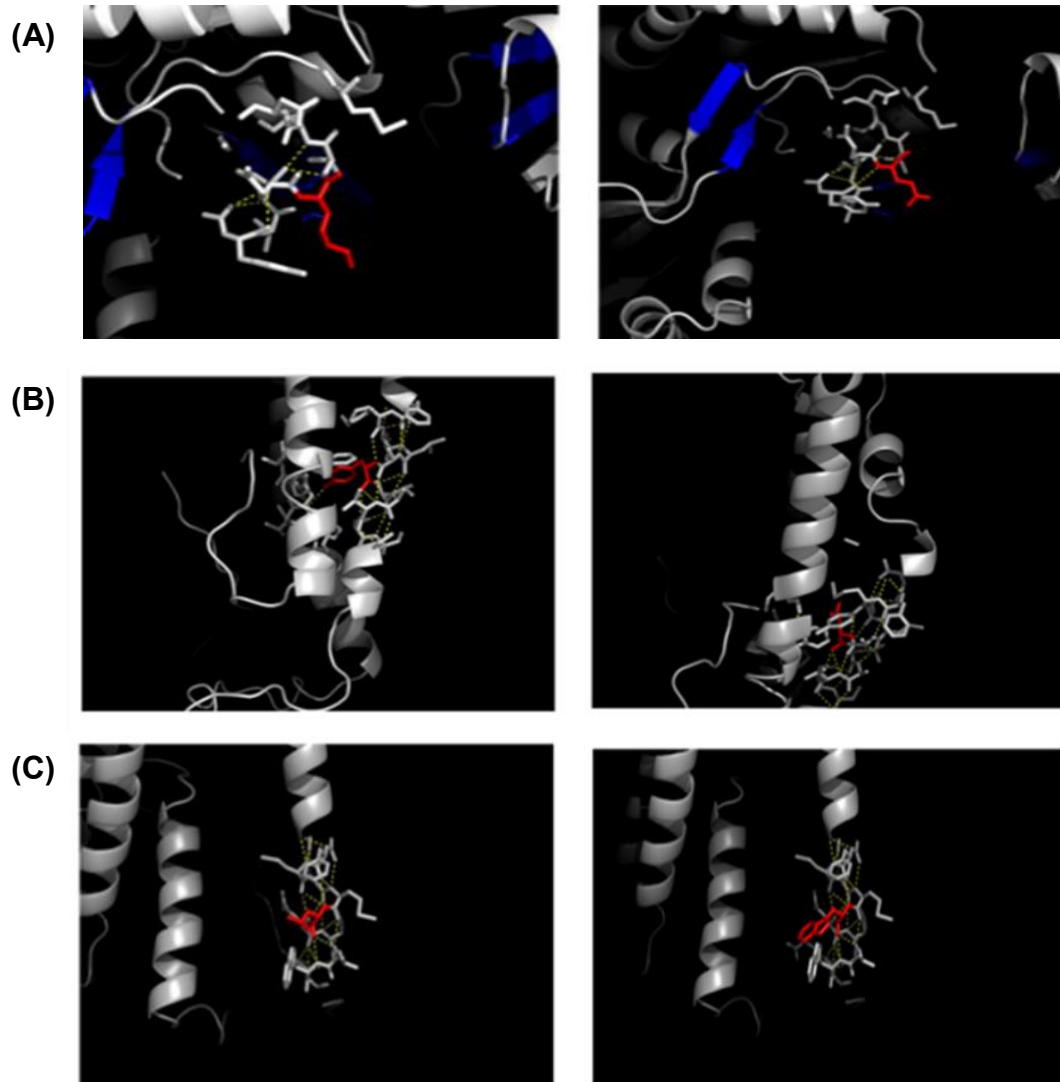

**Figure S4.** Protein modelling of three missense variants identified within GluK2 and GluK4 subunits.

(A) GluK2 K525E is located in the ligand binding domain and leads to creation of a hydrogen bond.

(B) GluK4 Y555N is located in the first transmembrane domain (TMD1) and causes the disruption of a hydrogen bond. (C) GluK4 L825W is located in the last transmembrane domain (TMD3) and

does not cause a change in hydrogen bonds.

Damaging coding variants within kainate receptor channel genes are enriched in individuals with schizophrenia, autism and intellectual disabilities.

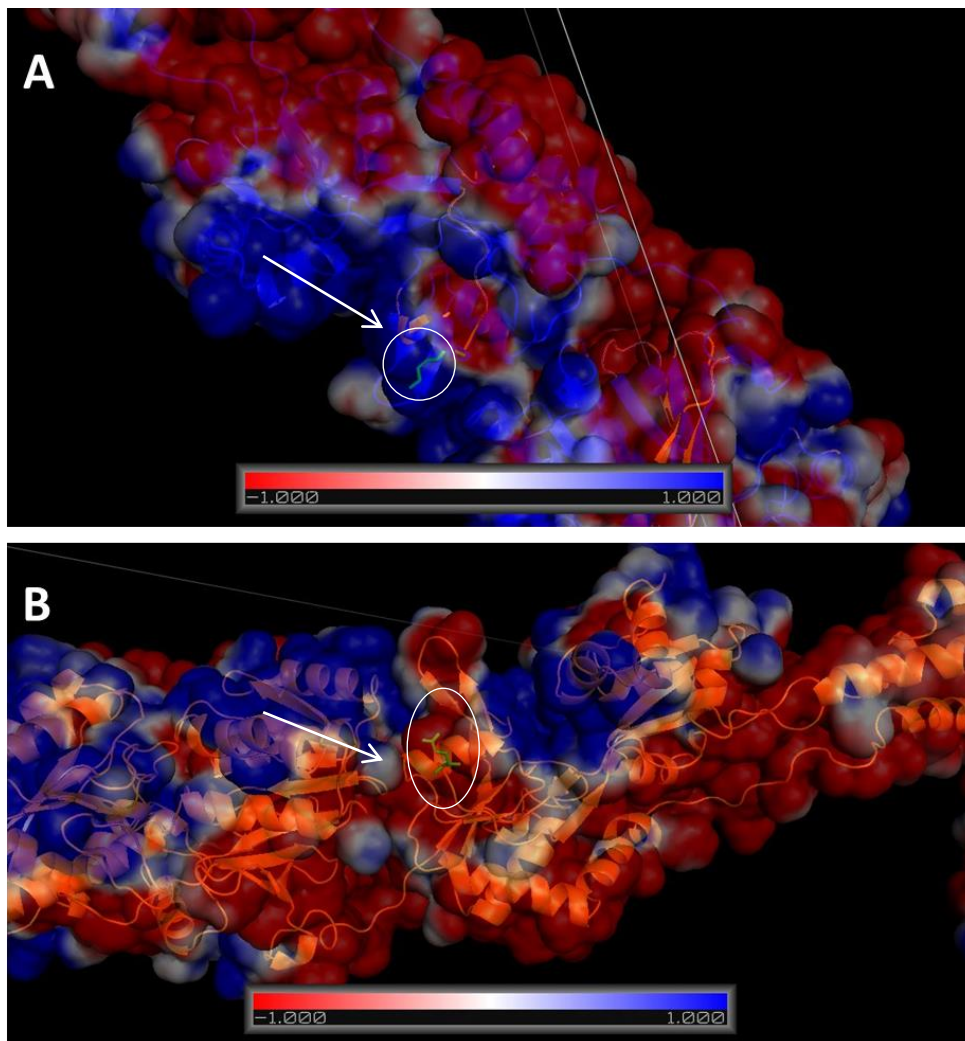

**Figure S5.** Protein modelling of the surface electrostatic potential for GluK2 K525E damaging missense variant. The green stick denotes GluK2 K525E (white arrow). Blue regions depict a positive electrostatic potential and red regions a negative electrostatic potential. **(A)** Shows the electrostatic potential of wildtype GluK2 K525 and **(B)** the electrostatic potential of mutated GluK2 E525. A decrease in positive electrostatic potential was observed for the mutated allele.

Damaging coding variants within kainate receptor channel genes are enriched in individuals with schizophrenia, autism and intellectual disabilities.

| <b>Datasets</b>                    | <b>Seq. context</b> | <b>Depth</b> | <b>No.</b> | <b>Disease</b>        | <b>Sample acknowledgements</b>                                                                                                                              |
|------------------------------------|---------------------|--------------|------------|-----------------------|-------------------------------------------------------------------------------------------------------------------------------------------------------------|
| UK10K_RARE_FIND (124) main release | Exome               | >40x         | 124        | ID                    | The Familial Intellectual Disability study or FIND study                                                                                                    |
| UK10K_NEURO_ASD_GALLAGHER          | Exome               | <10x         | 77         | ASD with ID           | Trinity College Dublin Autism Genetics Collection                                                                                                           |
| UK10K_NEURO_ASD_SKUSE              | Exome               | >40x         | 341        | ASD                   | Institute of Child Health & Great Ormond Street Hospital Autism Families Study                                                                              |
| UK10K_NEURO_IOP_COLLIER            | Exome               | ~20x         | 172        | SCZ, BP, Psy          | See list of publications (*)                                                                                                                                |
| UK10K_NEURO_MUIR                   | Exome               | >50x         | 175        | SCZ, ASD, Psy with ID | Edinburgh MR-psychosis samples                                                                                                                              |
| UK10K_NEURO_EDINBURGH              | Exome               | >50x         | 234        | SCZ                   | Edinburgh Schizophrenia samples                                                                                                                             |
| UK10K_NEURO_ABERDEEN               | Exome               | >50x         | 392        | SCZ                   | Scottish schizophrenia cases                                                                                                                                |
| UK10K_NEURO_GURLING                | Exome               | >40x         | 48         | SCZ                   | University College London Schizophrenia Family Samples                                                                                                      |
| UK10K_COHORT_IMGSAC                | Exome               | 45x          | 113        | ASD                   | “The International Molecular Genetic Study of Autism Consortium (IMGSAC)”                                                                                   |
| UK10K_COHORT_MGAS                  | Exome               | 45x          | 97         | ASD                   | The Molecular Genetics of Autism Study                                                                                                                      |
| UK10K_NEURO_UKSCZ                  | Exome               | 50x          | 553        | SCZ                   | Cardiff Scz                                                                                                                                                 |
| UK10K_NEURO_FSZNK                  | Exome               | 30x          | 285        | SCZ                   | National Institute for Health and Welfare (THL) Finnish Schizophrenia. Families from the “The genetic etiology of severe mental disorders in Finland” study |
| UK10K_OBESITY_TWINSUK              | Exome               | >30x         | 430*       | Control Population    | Generation Scotland:Scottish Family Health Study (GS:SFHS)                                                                                                  |
| UK10K_COHORT_TWINSUK               | Whole genome        | <12x         | 1854       | Control Population    | The TwinsUK Cohort                                                                                                                                          |

Damaging coding variants within kainate receptor channel genes are enriched in individuals with schizophrenia, autism and intellectual disabilities.

**Table S1.** UK10K datasets used in the current study. Dataset names, sequencing context and depth coverage, number of individuals, disease diagnosis and sample acknowledgements are presented. ASD, Autism Spectrum Disorder; BP, Bipolar Disorder; BMI, Body Mass Index; ID, Intellectual Disability; Psy, psychosis; Scz, schizophrenia; Seq. Context, sequencing context.

**\*Maudsley family study** Distribution of symptom dimensions across Kraepelinian divisions. Dikeos DG, Wickham H, McDonald C, Walshe M, Sigmundsson T, Bramon E, Grech A, Touloupoulou T, Murray R, Sham PC. *Br J Psychiatry.* 2006 Oct;189:346-53.

**\*GAP study** High-potency cannabis and the risk of psychosis. Di Forti M, Morgan C, Dazzan P, Pariante C, Mondelli V, Marques TR, Handley R, Luzi S, Russo M, Paparelli A, Butt A, Stilo SA, Wiffen B, Powell J, Murray RM. *Br J Psychiatry.* 2009 Dec;195(6):488-91.

**\*The Maudsley Twin Study.** Genetic overlap between episodic memory deficits and schizophrenia: results from The Maudsley Twin Study. Owens SF, Picchioni MM, Rijdsdijk FV, Stahl D, Vassos E, Rodger AK, Collier DA, Murray RM, Touloupoulou T. *Psychol Med.* 2011 Mar;41(3):521-32

| Gene         | HGNC  | Transcript code  | Protein          |
|--------------|-------|------------------|------------------|
| <i>GRIK1</i> | 4579  | ENST00000327783  | <u>E7ENK3</u>    |
| <i>GRIK2</i> | 4580  | <u>NM_021956</u> | <u>NP_068775</u> |
| <i>GRIK3</i> | 4581  | <u>NM_000831</u> | <u>NP_000822</u> |
| <i>GRIK4</i> | 4582  | NM_01282470      | NP_001269399     |
| <i>GRIK5</i> | 4583  | <u>NM_002088</u> | <u>NP_002079</u> |
| <i>NETO1</i> | 13823 | NM_001201465     | NP_001188394     |
| <i>NETO2</i> | 14644 | NM_001201477     | NP_00188406      |

**Table S2.** Gene, Hugo Gene Nomenclature Committee (HGNC), gene code, transcript and protein codes of *GRIK* and *NETO* genes. The transcripts were identified as the primary transcripts expressed in brain using the Genotype-Tissue Expression (GTEx) database.



Damaging coding variants within kainate receptor channel genes are enriched in individuals with schizophrenia, autism and intellectual disabilities.

| Protein           | PDB name | Source  |
|-------------------|----------|---------|
| GluK1             | -        | RaptorX |
| GluK1 LBD dimer   | 2ZNS     | PDB     |
| GluK2             | -        | RaptorX |
| GluK2 LBD dimer   | 2XXT     | PDB     |
| GluK2EM LBD dimer | 5CMM     | PDB     |
| GluK3             | -        | RaptorX |
| GluK4             | -        | RaptorX |
| GluK4 LBD         | 5IKB     | PDB     |
| GluK5             | -        | RaptorX |
| NETO1             | -        | RaptorX |
| NETO2             | -        | RaptorX |

**Table S3.** Protein modelling templates and Protein Data Bank (PDB) files used in the *in silico* protein modeling. The PDB name and source of template is listed for each protein.

Damaging coding variants within kainate receptor channel genes are enriched in individuals with schizophrenia, autism and intellectual disabilities.

| Gene         | Total variants | LoF & missense variants | Rare LoF & missense variants | Regulatory variants | Rare regulatory variants |
|--------------|----------------|-------------------------|------------------------------|---------------------|--------------------------|
| <i>GRIK1</i> | 42             | 24                      | 24                           | 18                  | 16                       |
| <i>GRIK2</i> | 38             | 21                      | 18                           | 17                  | 14                       |
| <i>GRIK3</i> | 71             | 25                      | 23                           | 46                  | 45                       |
| <i>GRIK4</i> | 55             | 27                      | 25                           | 28                  | 24                       |
| <i>GRIK5</i> | 47             | 31                      | 26                           | 16                  | 14                       |
| <i>NETO1</i> | 26             | 14                      | 13                           | 12                  | 10                       |
| <i>NETO2</i> | 18             | 12                      | 8                            | 6                   | 5                        |
| <b>Total</b> | <b>297</b>     | <b>154</b>              | <b>137</b>                   | <b>143</b>          | <b>128</b>               |

**Table S4.** Coding variants within GRIK and NETO genes identified during the first discovery phase. The absolute numbers of total, LoF and missense, rare LoF and missense, and, regulatory variants are detailed.

Damaging coding variants within kainate receptor channel genes are enriched in individuals with schizophrenia, autism and intellectual disabilities.

| <b>Gene</b>  | <b>Total variants</b> | <b>LoF &amp; missense variants</b> | <b>Rare LoF &amp; missense variants</b> | <b>Regulatory variants</b> | <b>Rare regulatory variants</b> |
|--------------|-----------------------|------------------------------------|-----------------------------------------|----------------------------|---------------------------------|
| <i>GRIK1</i> | 8                     | 4                                  | 4                                       | 4                          | 4                               |
| <i>GRIK2</i> | 8                     | 5                                  | 5                                       | 3                          | 3                               |
| <i>GRIK3</i> | 9                     | 4                                  | 4                                       | 5                          | 5                               |
| <i>GRIK4</i> | 12                    | 7                                  | 7                                       | 5                          | 5                               |
| <i>GRIK5</i> | 9                     | 5                                  | 5                                       | 4                          | 4                               |
| <i>NETO1</i> | 12                    | 5                                  | 5                                       | 7                          | 7                               |
| <i>NETO2</i> | 8                     | 6                                  | 6                                       | 2                          | 2                               |
| <b>Total</b> | <b>66</b>             | <b>36</b>                          | <b>36</b>                               | <b>30</b>                  | <b>30</b>                       |

**Table S5.** Summary of coding variants within GRIK and NETO genes identified exclusively within affected individuals during the first discovery phase. The absolute numbers of total, LoF and missense, rare LoF and missense, and, regulatory variants are detailed.

Damaging coding variants within kainate receptor channel genes are enriched in individuals with schizophrenia, autism and intellectual disabilities.

| Gene         | Total variants | LoF & missense variants | Rare LoF & missense variants | Regulatory variants | Rare regulatory variants |
|--------------|----------------|-------------------------|------------------------------|---------------------|--------------------------|
| <i>GRIK1</i> | 24             | 16                      | 16                           | 8                   | 8                        |
| <i>GRIK2</i> | 20             | 11                      | 10                           | 9                   | 9                        |
| <i>GRIK3</i> | 40             | 17                      | 15                           | 23                  | 23                       |
| <i>GRIK4</i> | 28             | 15                      | 13                           | 13                  | 13                       |
| <i>GRIK5</i> | 31             | 21                      | 20                           | 10                  | 10                       |
| <i>NETO1</i> | 7              | 4                       | 4                            | 3                   | 3                        |
| <i>NETO2</i> | 8              | 5                       | 1                            | 3                   | 3                        |
| <b>Total</b> | <b>158</b>     | <b>89</b>               | <b>79</b>                    | <b>69</b>           | <b>69</b>                |

**Table S6.** Summary of coding variants within GRIK and NETO genes identified exclusively within control individuals during the first discovery phase. The absolute numbers of total, LoF and missense, rare LoF and missense, and, regulatory variants are detailed.

Damaging coding variants within kainate receptor channel genes are enriched in individuals with schizophrenia, autism and intellectual disabilities.

| Gene         | Total variants | LoF & missense variants | Rare LoF & missense variants | Regulatory variants | Rare regulatory variants |
|--------------|----------------|-------------------------|------------------------------|---------------------|--------------------------|
| <i>GRIK1</i> | 10             | 4                       | 4                            | 6                   | 1                        |
| <i>GRIK2</i> | 10             | 5                       | 3                            | 5                   | 2                        |
| <i>GRIK3</i> | 22             | 4                       | 4                            | 18                  | 12                       |
| <i>GRIK4</i> | 15             | 5                       | 5                            | 10                  | 10                       |
| <i>GRIK5</i> | 8              | 6                       | 1                            | 2                   | 2                        |
| <i>NETO1</i> | 7              | 5                       | 4                            | 2                   | 2                        |
| <i>NETO2</i> | 2              | 1                       | 1                            | 1                   | 0                        |
| <b>Total</b> | <b>74</b>      | <b>30</b>               | <b>22</b>                    | <b>44</b>           | <b>29</b>                |

**Table S7.** Summary of coding variants within GRIK and NETO genes shared within control and case individuals during the first discovery phase. The absolute numbers of total, LoF and missense, rare LoF and missense, and, regulatory variants are detailed.

|                              | PD/PsD    | Benign    |
|------------------------------|-----------|-----------|
| <b>Cases</b>                 | <b>77</b> | <b>13</b> |
| <b>Controls &amp; Shared</b> | <b>38</b> | <b>22</b> |

**Table S8.** Number of damaging missense or benign missense variants identified in affected cases only or shared or in controls only during the first discovery phase. Abbreviations: PD, probably damaging; PsD, possibly damaging.

Damaging coding variants within kainate receptor channel genes are enriched in individuals with schizophrenia, autism and intellectual disabilities.

|                      | All MAF<br>All 'of<br>interest'              | All MAF<br>LoF & Mis                        | All MAF<br>Reg                               | MAF < 1%<br>All 'of<br>interest'             | MAF < 1%<br>LoF & Mis                       | MAF < 1%<br>Reg         |
|----------------------|----------------------------------------------|---------------------------------------------|----------------------------------------------|----------------------------------------------|---------------------------------------------|-------------------------|
| <b>GRIK1</b>         | $p=6.13 \times 10^{-4}$                      | $p=0.003$                                   | $p=0.023$                                    | $p=0.340$                                    | $p=0.548$                                   | $p=0.273$               |
| <b>GRIK2</b>         | $p=0.022$                                    | $p=0.427$                                   | $p=0.024$                                    | $p=0.006$                                    | $p=0.021$                                   | $p=0.144$               |
| <b>GRIK3</b>         | $p=1.26 \times 10^{-5}$                      | $p=0.018$                                   | $p=0.002$                                    | $p=0.003$                                    | $p=0.549$                                   | $p=0.002$               |
| <b>GRIK4</b>         | $p=1.9 \times 10^{-4}$                       | $p=0.008$                                   | $p=0.012$                                    | $p=1.99 \times 10^{-4}$                      | $p=0.008$                                   | $p=0.012$               |
| <b>GRIK5</b>         | $p=3.96 \times 10^{-6}$                      | <b><math>p=9.99 \times 10^{-6}^*</math></b> | $p=0.020$                                    | $p=4.07 \times 10^{-6}$                      | <b><math>p=9.99 \times 10^{-6}^*</math></b> | $p=0.021$               |
| <b>NETO1</b>         | <b><math>p=8.95 \times 10^{-7}^*</math></b>  | $p=0.154$                                   | <b><math>p=4.66 \times 10^{-16}^*</math></b> | $p=0.06$                                     | $p=0.154$                                   | $p=0.055$               |
| <b>NETO2</b>         | $p=0.852$                                    | $p=0.385$                                   | $p=0.80$                                     | $p=0.514$                                    | $p=0.385$                                   | $p=0.799$               |
| <b>ALL<br/>GENES</b> | <b><math>p=3.38 \times 10^{-20}^*</math></b> | <b><math>p=2.97 \times 10^{-8}^*</math></b> | <b><math>p=7.72 \times 10^{-8}^*</math></b>  | <b><math>p=2.07 \times 10^{-15}^*</math></b> | <b><math>p=6.02 \times 10^{-7}^*</math></b> | $p=1.17 \times 10^{-6}$ |

**Table S9.** Burden analysis results for the first discovery phase and at an individual gene level.

Tests were conducted first across all variant categories and including all MAFs, followed by LoF and missense, regulatory and rare variants (MAF < 1%) analysed separately. The asterisk (\*) denotes variant categories showing GWA or nominal significance association p-values.

Damaging coding variants within kainate receptor channel genes are enriched in individuals with schizophrenia, autism and intellectual disabilities.

|              | All MAF<br>All 'of<br>interest' | All MAF Mis<br>& LoF        | All MAF<br>Reg           | MAF < 1%<br>All 'of<br>interest' | MAF < 1%<br>LoF & Mis       | MAF <1%<br>Reg           |
|--------------|---------------------------------|-----------------------------|--------------------------|----------------------------------|-----------------------------|--------------------------|
| <b>GRIK1</b> | $p= 0.17$                       | $p= 0.33$                   | $p= 0.15$                | $p= 0.67$                        | $p= 0.62$                   | $p= 0.58$                |
| <b>GRIK2</b> | $p= 0.03$                       | $p= 0.18$                   | $p= 0.03$                | $p= 0.30$                        | $p= 0.04$                   | $p= 0.87$                |
| <b>GRIK3</b> | $p= 0.05$                       | $p= 0.30$                   | $p= 0.02$                | $p= 0.08$                        | $p= 0.18$                   | $p= 0.02$                |
| <b>GRIK4</b> | $p= 0.05$                       | $p= 0.47$                   | $p= 0.08$                | $p= 0.01$                        | $p= 0.33$                   | $p= 0.05$                |
| <b>GRIK5</b> | $p= 3.12 \times 10^{-8} *$      | $p= 7.83 \times 10^{-10} *$ | $p= 0.01$                | $p= 2.10 \times 10^{-10} *$      | $p= 7.83 \times 10^{-10} *$ | $p= 2.00 \times 10^{-4}$ |
| <b>NETO1</b> | $p= 6.76 \times 10^{-6} *$      | $p= 4 \times 10^{-4}$       | $p= 2.64 \times 10^{-5}$ | $p= 5.44 \times 10^{-6} *$       | $p= 1 \times 10^{-4}$       | $p= 1.84 \times 10^{-5}$ |
| <b>NETO2</b> | $p= 0.53$                       | $p= 0.49$                   | $p= 0.28$                | $p= 0.83$                        | $p= 0.49$                   | $p= 0.44$                |

**Table S10.** Burden analysis data for each individual gene and for a psychosis phenotype generated during for the first discovery phase. Individuals diagnosed with psychosis were compared to unaffected control individuals. Tests were conducted first across all variant categories and including all MAFs, followed by LoF and missense, regulatory and rare variants (MAF < 1%) analysed separately. The asterisk (\*) denotes variant categories showing GWA or nominal significance association p-values.

Damaging coding variants within kainate receptor channel genes are enriched in individuals with schizophrenia, autism and intellectual disabilities.

|              | All MAF<br>All 'of<br>interest' | All MAF<br>LoF & Mis       | All MAF<br>Reg           | MAF < 1%<br>All 'of<br>interest' | MAF < 1%<br>LoF & Mis      | MAF < 1%<br>Reg          |
|--------------|---------------------------------|----------------------------|--------------------------|----------------------------------|----------------------------|--------------------------|
| <b>GRIK1</b> | $p= 1.20 \times 10^{-5}$        | $p=2 \times 10^{-4}$       | $p= 0.005$               | $p= 0.112$                       | $p= 0.418$                 | $p= 0.105$               |
| <b>GRIK2</b> | $p= 0.003$                      | $p= 0.165$                 | $p= 0.074$               | $p= 3 \times 10^{-4}$            | $p= 0.064$                 | $p= 3.00 \times 10^{-4}$ |
| <b>GRIK3</b> | $p= 3.31 \times 10^{-13} *$     | $p= 2.33 \times 10^{-7} *$ | $p= 0.003$               | $p= 0.016$                       | $p= 0.535$                 | $p= 0.003$               |
| <b>GRIK4</b> | $p= 4 \times 10^{-4}$           | $p= 0.005$                 | $p= 4.09 \times 10^{-5}$ | $p= 7.89 \times 10^{-9} *$       | $p= 3.07 \times 10^{-6} *$ | $p= 0.017$               |
| <b>GRIK5</b> | $p= 0.076$                      | $p= 0.130$                 | $p= 0.492$               | $p= 0.002$                       | $p= 0.130$                 | $p= 0.005$               |
| <b>NETO1</b> | $p= 2.79 \times 10^{-12} *$     | $p= 0.390$                 | $p= 0.328$               | $p= 0.086$                       | $p= 0.074$                 | $p= 0.328$               |
| <b>NETO2</b> | $p= 0.697$                      | $p= 0.299$                 | $p=0.692$                | $p= 0.420$                       | $p=0.299$                  | $p= 0.439$               |

**Table S11.** Burden analysis data generated for ASD and ID phenotypes within individual genes during the first discovery phase. Tests were conducted across all variant categories and included variants at all MAFs followed by LoF and missense, regulatory and rare variants (MAF < 1%) analysed separately. The asterisk (\*) denotes variant categories showing GWA or nominal significance association p-values.



Damaging coding variants within kainate receptor channel genes are enriched in individuals with schizophrenia, autism and intellectual disabilities.

| Gene         | Total variants | LoF & missense variants | Rare LoF & missense variants | Regulatory variants | Rare regulatory variants |
|--------------|----------------|-------------------------|------------------------------|---------------------|--------------------------|
| <i>GRIK1</i> | 23             | 12                      | 11                           | 11                  | 8                        |
| <i>GRIK2</i> | 28             |                         | 10                           | 14                  | 10                       |
| <i>GRIK3</i> | 44             | 23                      | 22                           | 21                  | 20                       |
| <i>GRIK4</i> | 28             | 10                      | 7                            | 18                  | 14                       |
| <i>GRIK5</i> | 31             | 17                      | 17                           | 14                  | 12                       |
| <i>NETO1</i> | 28             | 13                      | 7                            | 15                  | 11                       |
| <i>NETO2</i> | 15             | 8                       | 6                            | 7                   | 7                        |
| <b>Total</b> | <b>197</b>     | <b>97</b>               | <b>80</b>                    | <b>100</b>          | <b>82</b>                |

**Table S12.** Summary of coding variants within GRIK and NETOs genes identified during the second discovery phase. The absolute numbers of total, LoF and missense, rare LoF and missense, and, regulatory variants are detailed.

|              | Total variants | LoF & missense variants | Rare LoF & missense variants | Regulatory variants | Rare regulatory variants |
|--------------|----------------|-------------------------|------------------------------|---------------------|--------------------------|
| <i>GRIK1</i> | 8              | 4                       | 4                            | 4                   | 4                        |
| <i>GRIK2</i> | 8              | 5                       | 5                            | 3                   | 3                        |
| <i>GRIK3</i> | 9              | 4                       | 4                            | 5                   | 5                        |
| <i>GRIK4</i> | 12             | 7                       | 7                            | 5                   | 5                        |
| <i>GRIK5</i> | 9              | 5                       | 5                            | 4                   | 4                        |
| <i>NETO1</i> | 12             | 5                       | 5                            | 7                   | 7                        |
| <i>NETO2</i> | 8              | 6                       | 6                            | 2                   | 2                        |
| <b>Total</b> | <b>66</b>      | <b>36</b>               | <b>36</b>                    | <b>30</b>           | <b>30</b>                |

**Table S13.** Summary of coding variants within GRIK and NETOs genes identified exclusively within affected individuals during the second discovery phase. The absolute numbers of total, LoF and missense, rare LoF and missense, and, regulatory variants are detailed.

Damaging coding variants within kainate receptor channel genes are enriched in individuals with schizophrenia, autism and intellectual disabilities.

|              | Total variants | LoF & missense variants | Rare LoF & missense variants | Regulatory variants | Rare regulatory variants |
|--------------|----------------|-------------------------|------------------------------|---------------------|--------------------------|
| <i>GRIK1</i> | 11             | 4                       | 5                            | 7                   | 4                        |
| <i>GRIK2</i> | 13             | 6                       | 2                            | 7                   | 6                        |
| <i>GRIK3</i> | 30             | 17                      | 17                           | 13                  | 12                       |
| <i>GRIK4</i> | 6              | 2                       | 0                            | 4                   | 5                        |
| <i>GRIK5</i> | 14             | 9                       | 9                            | 5                   | 7                        |
| <i>NETO1</i> | 8              | 4                       | 0                            | 4                   | 3                        |
| <i>NETO2</i> | 6              | 2                       | 0                            | 4                   | 4                        |
| <b>Total</b> | <b>88</b>      | <b>44</b>               | <b>32</b>                    | <b>44</b>           | <b>41</b>                |

**Table S14.** Summary of coding variants within GRIK and NETOs genes found exclusively within control individuals found identified during the second discovery phase. The absolute numbers of total, LoF and missense, rare LoF and missense, and, regulatory variants are detailed.

|              | Total variants | LoF & missense variants | Rare LoF & missense variants | Regulatory variants | Rare regulatory variants |
|--------------|----------------|-------------------------|------------------------------|---------------------|--------------------------|
| <i>GRIK1</i> | 4              | 4                       | 2                            | 0                   | 0                        |
| <i>GRIK2</i> | 7              | 3                       | 2                            | 4                   | 1                        |
| <i>GRIK3</i> | 5              | 2                       | 1                            | 3                   | 2                        |
| <i>GRIK4</i> | 10             | 1                       | 0                            | 9                   | 3                        |
| <i>GRIK5</i> | 8              | 3                       | 3                            | 5                   | 2                        |
| <i>NETO1</i> | 8              | 4                       | 2                            | 4                   | 3                        |
| <i>NETO2</i> | 1              | 0                       | 0                            | 1                   | 1                        |
| <b>Total</b> | <b>43</b>      | <b>17</b>               | <b>10</b>                    | <b>26</b>           | <b>11</b>                |

**Table S15.** Summary of coding variants within GRIK and NETOs genes found shared within case and control individuals identified during the second discovery phase. The absolute numbers of total, LoF and missense, rare LoF and missense, and, regulatory variants are detailed.

Damaging coding variants within kainate receptor channel genes are enriched in individuals with schizophrenia, autism and intellectual disabilities.

|                              | PD /PsD   | Benign    |
|------------------------------|-----------|-----------|
| <b>Cases</b>                 | <b>34</b> | <b>14</b> |
| <b>Controls &amp; Shared</b> | <b>24</b> | <b>26</b> |

**Table S16.** Number of damaging missense or benign missense variants identified in affected cases only or shared or in controls only during the second discovery phase. Abbreviations: PD, probably damaging; PsD, possibly damaging.

|              | All MAF, All 'of interest'  | All MAF, Reg                | All MAF, LoF & mis          | MAF < 1%, All 'of interest' | MAF < 1%, Reg            | MAF < 1%, LoF & mis |
|--------------|-----------------------------|-----------------------------|-----------------------------|-----------------------------|--------------------------|---------------------|
| <b>GRIK1</b> | $p= 0.55$                   | $p= 0.17$                   | $p= 0.51$                   | $p= 0.26$                   | $p= 0.139$               | $p= 0.37$           |
| <b>GRIK2</b> | $p= 0.22$                   | $p= 0.01$                   | $p= 0.26$                   | $p= 0.01$                   | $p= 0.02$                | $p= 0.46$           |
| <b>GRIK3</b> | $p= 2.17 \times 10^{-11} *$ | $p= 0.02$                   | $p= 5.24 \times 10^{-10} *$ | $p= 0.01$                   | $p= 6.48 \times 10^{-5}$ | $p= 0.02$           |
| <b>GRIK4</b> | $p= 0.01$                   | $p= 1 \times 10^{-4}$       | $p= 0.26$                   | $p= 3.57 \times 10^{-12} *$ | $p= 2 \times 10^{-4}$    | $p= 0.35$           |
| <b>GRIK5</b> | $p= 0.02$                   | $p= 0.02$                   | $p= 0.13$                   | $p= 0.01$                   | $p= 3.37 \times 10^{-5}$ | $p= 0.13$           |
| <b>NETO1</b> | $p= 1.73 \times 10^{-10} *$ | $p= 1.61 \times 10^{-28} *$ | $p= 0.28$                   | $p= 0.02$                   | $p= 0.01$                | $p= 0.17$           |
| <b>NETO2</b> | $p= 1.48 \times 10^{-9} *$  | $p= 8.03 \times 10^{-10} *$ | $p= 0.37$                   | $p= 0.31$                   | $p= 0.02$                | $p= 0.37$           |

**Table S17.** Burden analysis data at an individual gene level generated during the second discovery phase. Individuals diagnosed with psychosis were compared to unaffected control individuals. Tests were conducted across all variant categories and included variants at all MAFs. The asterisk (\*) denotes variant categories showing GWA or nominal significance association p-values.

Damaging coding variants within kainate receptor channel genes are enriched in individuals with schizophrenia, autism and intellectual disabilities.

| Gene         | cDNA                       | Type   | Dataset                                   | Allele count cases | MAF cases | Allele count non-psy arm | MAF non-psy arm | P value                    | Odds ratio |
|--------------|----------------------------|--------|-------------------------------------------|--------------------|-----------|--------------------------|-----------------|----------------------------|------------|
| <i>GRIK1</i> | c.1173C>T<br>(p.Asp391Asp) | Syn    | All neuro<br>(1,700 exomes)               | 434/<br>3,288      | 0.132     | 17,203/<br>90,756        | 0.23            | 2.41 x 10 <sup>-16</sup> * | 0.65       |
| <i>GRIK2</i> | c.-88A>G                   | Splice | Replication<br>SCZ<br>(838 exomes)        | 4/<br>1,662        | 0.0024    | 0/<br>90,756             | 0               | 2.42 x 10 <sup>-6</sup>    | Inf        |
| <i>GRIK2</i> | c.1095+7T>C                | Splice | Replication<br>SCZ<br>(838 exomes)        | 243/<br>1,218      | 0.1995    | 24,055/<br>90,756        | 0.36            | 1.93 x 10 <sup>-17</sup> * | 0.55       |
| <i>GRIK3</i> | c.357T>C<br>(p.Asn119Asn)  | Syn    | All neuro<br>(1,700 exomes)               | 15/<br>3,288       | 0.0046    | 3,550/<br>90,756         | 0.04            | 2.72 x 10 <sup>-35</sup> * | 0.11       |
| <i>GRIK4</i> | c.1582G>A<br>(p.Val528Ile) | Mis    | All neuro<br>(1,700 exomes)               | 8/<br>3,288        | 0.0024    | 1,028/<br>90,756         | 0.01            | 1.09 x 10 <sup>-6</sup>    | 0.21       |
| <i>GRIK4</i> | c.1635G>A<br>(p.Pro545Pro) | Syn    | Replication<br>SCZ<br>(838 exomes)        | 556/<br>1,218      | 0.4565    | 27,872/<br>90,756        | 0.44            | 4.35 x 10 <sup>-22</sup> * | 1.80       |
| <i>GRIK5</i> | c.2679C>G<br>(p.Ala893Ala) | Syn    | All neuro<br>(1,700 exomes)               | 11/<br>3,288       | 0.0033    | 0/<br>90,756             | 0               | 4.56 x 10 <sup>-15</sup> * | Inf        |
| <i>GRIK5</i> | c.1843C>T<br>(p.Leu615Leu) | Syn    | Replication<br>SCZ exomes<br>(838 exomes) | 6/<br>1,218        | 0.0018    | 15/<br>90,756            | 0.0002          | 6.16 x 10 <sup>-5</sup>    | 21.9       |
| <i>NETO1</i> | c.1460C>G<br>(p.Ala487Gly) | Mis    | All neuro<br>(1,700 exomes)               | 3/<br>3,288        | 0.0009    | 704/<br>90,756           | 0.008           | 1.12 x 10 <sup>-6</sup>    | 0.11       |
| <i>NETO1</i> | c.-41G>A                   | Splice | Replication<br>SCZ exomes<br>(838 exomes) | 4/<br>3,288        | 0.0012    | 0/<br>90,756             | 0               | 2.40 x 10 <sup>-6</sup>    | Inf        |
| <i>NETO2</i> | c.1366T>A<br>(p.Ser456Thr) | Mis    | All neuro<br>(1,700 exomes)               | 3/<br>3,288        | 0.0009    | 808/<br>90,756           | 0.009           | 3.47 x 10 <sup>-8</sup>    | 0.10       |

**Table S18.** Re-assessing single allele associations using the EXAC non-psy control population.

Damaging missense variants with nominal significant associations and synonymous or splice site variants with GWA or nominal significant associations are displayed. Gene, Amino acid change, variant cDNA and HGVS nomenclature, case and control minor allele frequencies, *p*

Damaging coding variants within kainate receptor channel genes are enriched in individuals with schizophrenia, autism and intellectual disabilities.

values and odds ratio are provided. The asterisk before the p values (\*) indicates genetic variants with significant GWA associated p values. Abbreviations: EXAC, Exome Aggregation Consortium; Inf, infinity; MAF, Minor Allele Frequency; Mis, missense; protein cons, protein consequence; Scz, schizophrenia; Splice, splice site variant; Syn, synonymous.

Damaging coding variants within kainate receptor channel genes are enriched in individuals with schizophrenia, autism and intellectual disabilities.

| Gene         | cDNA                       | Type | MAF (count)<br>psy ExAC  | MAF (count)<br>control ExAC | P value                   | OR<br>(CI)               |
|--------------|----------------------------|------|--------------------------|-----------------------------|---------------------------|--------------------------|
| <i>GRIK1</i> | c.1173C>T<br>(p.Asp391Asp) | Syn  | 0.145<br>(4,354/30,000)  | 0.189<br>(17,203/90,756)    | 6.135 x10 <sup>-68</sup>  | 0.726<br>(0.700 – 0.753) |
| <i>GRIK2</i> | c.1095+7T>C                | Spl  | 0.219<br>(6,580/30,000)  | 0.265<br>(24,055/90,756)    | 4.496 x10 <sup>-56</sup>  | 0.779<br>(0.755 – 0.804) |
| <i>GRIK3</i> | c.357T>C<br>(p.Asn119Asn)  | Syn  | 0.013<br>(392/30,000)    | 0.039<br>(3 558/90,756)     | 7.02 x 10 <sup>-108</sup> | 0.325<br>(0.291 – 0.361) |
| <i>GRIK3</i> | c.2593A>G<br>(p.Arg865Gly) | Mis  | 0.006<br>(190/30,000)    | 0.004<br>(396/90,756)       | 2.075 x10 <sup>-5</sup>   | 1.491<br>(1.216 – 1.734) |
| <i>GRIK4</i> | c.1635G>A<br>(p.Pro545Pro) | Syn  | 0.348<br>(10,433/30,000) | 0.307<br>(27 872/90,756)    | 2.597 x10 <sup>-39</sup>  | 1.212<br>(1.170 – 1.236) |
| <i>GRIK5</i> | c.1843C>T<br>(p.Leu615Leu) | Syn  | 0.000<br>(0/30,000)      | 0.0002<br>(15/90,756)       | 0.026                     | 0.000<br>(0.000 – 0.843) |

**Table S19.** Re-assessing single allele associations using ExAC case and control data. Damaging missense variants with nominal significant associations and synonymous or splice site variants with GWA or nominal significant associations are displayed. Abbreviations: CI, Confidence Interval; ExAC, Exome Aggregation Consortium; MAF, Minor Allele Frequency; Mis, missense variant; OR, Odds Ratio; psy, psychiatric cases; Spl, splice variant; Syn, synonymous variant.

Damaging coding variants within kainate receptor channel genes are enriched in individuals with schizophrenia, autism and intellectual disabilities.

| Receptor               | [Agonist]<br>(M) | $I_{\text{peak}}$<br>(nA) - Glu | $(\tau_{\text{decay}})$<br>(ms) - Glu | $\tau_{\text{deact}}$<br>(s) - Glu |
|------------------------|------------------|---------------------------------|---------------------------------------|------------------------------------|
| hGluK2                 | $10^{-4}$        | $-154 \pm 95.5$ (12)            | $805 \pm 220$ (11)                    | $1.5 \pm 0.8$ (7)                  |
|                        | $10^{-3}$        | $-306 \pm 189.1$ (12)           | $517 \pm 141$ (14)                    | $2.3 \pm 0.8$ (7)                  |
| hGluK2/hGluK4          | $10^{-4}$        | $-60.0 \pm 69.4$ (12)           | $354 \pm 42$ (11)                     |                                    |
|                        | $10^{-3}$        | $-56.6 \pm 50.8$ (12)           | $296 \pm 48$ (10)                     |                                    |
| hGluK2/hGluK4<br>Y555N | $10^{-4}$        | $-13.3 \pm 14.8$ (13)           | $810 \pm 127$ (10)                    |                                    |
|                        | $10^{-3}$        | $-34.4 \pm 59$ (13)             | $343 \pm 56$ (11)                     |                                    |
| hGluK2/hGluK4<br>L825W | $10^{-4}$        | $-22.0 \pm 24.4$ (17)           | $801 \pm 240$ (8)                     |                                    |
|                        | $10^{-3}$        | $-38.0 \pm 39.4$ (18)           | $318 \pm 60$ (9)                      |                                    |
| hGluK2/hGluK2<br>K525E | $10^{-4}$        | $-16.2 \pm 15$ (16)             | $478 \pm 80$ (5)                      | $3.4 \pm 1.0$ (7)                  |
|                        | $10^{-3}$        | $-89.0 \pm 64$ (17)             | $206 \pm 51$ (6)                      | $6.0 \pm 2.9$ (8)                  |

**Table S20.** Time constants for current decay ( $\tau_{\text{decay}}$ ) and deactivation ( $\tau_{\text{deact}}$ ) and peak current measurements ( $I_{\text{peak}}$ ) are presented for wild-type and mutated h.GluK2 and h.GluK2/GluK4 KARs with SEM and N values for two standard agonist (glutamate) concentrations. hGluK2 and hGluK2 denotes human GluK2 and GluK4 subunits.
